# Supplementary material
Source: publisher site journal article supplement (https://www.spandidos-publications.com/5424/downloadSupplementary)

Figure S1. SP-C expression following induced differentiation of MSC-p130 and MSC-E2F4 into type II alveolar epithelial cells *in vitro* upon canonical Wnt signaling pathway inhibition (n=3). \*\*\*\*P<0.0001 vs. DKK-1 + MSC-NC group. Co-culture with MSC-E2F4, MSC-E2F4 co-cultured with MLE-12 cells with SAGM and DKK-1 added; Co-culture with MSC-NC, MSC-NC co-cultured with MLE-12 cells with SAGM and DKK-1 added; Co-culture with MSC-p130, MSC-p130 co-cultured with MLE-12 cells with SAGM and DKK-1 added; DKK-1, Dickkopf-related protein 1; MSCs, mouse mesenchymal stem cells; MSC-p130, MSCs overexpressing p130; MSC-E2F4, MSCs overexpressing E2F transcription factor 4; NC, normal control; SAGM, small airway growth medium; SP-C, surfactant protein C.

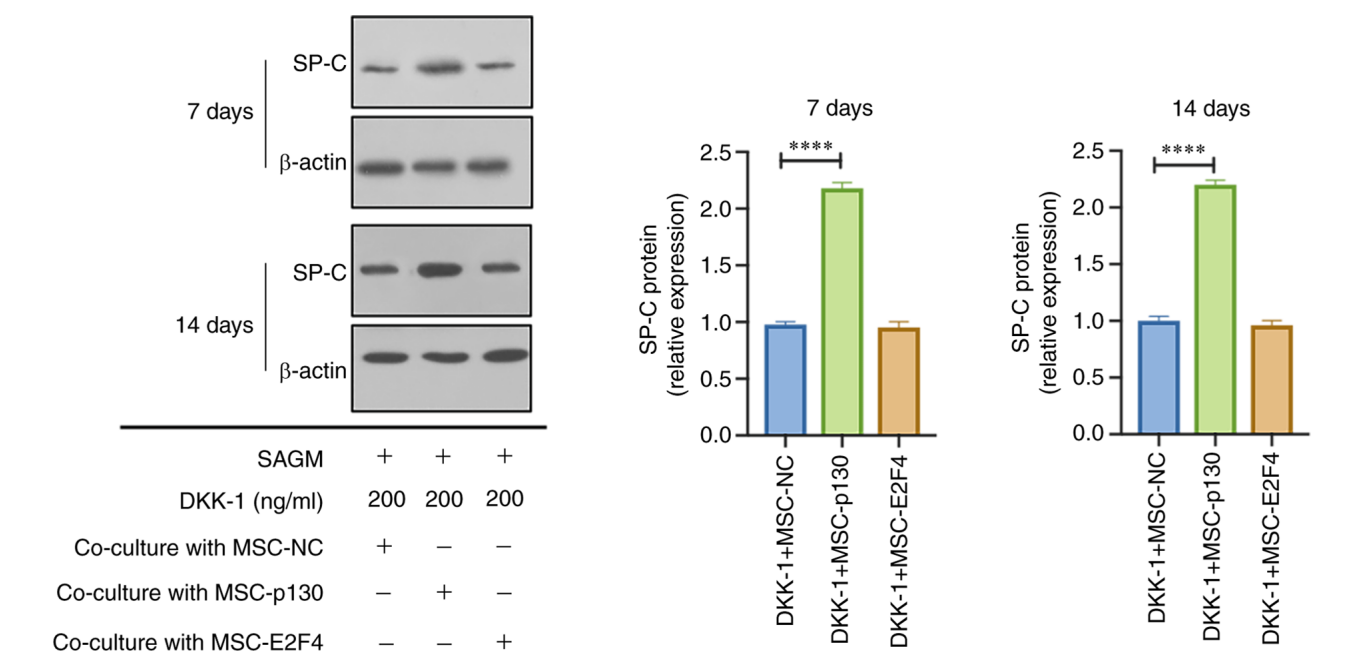

Supplement: Supplementary file 1 [file downloadSupplementary]
